# Supplementary material for: Efficacy of Liver-Directed Combined Radiotherapy in Locally Advanced Hepatocellular Carcinoma with Portal Vein Tumor Thrombosis
Source: MDPI journal article supplement (doi:10.3390/cancers15123164), 2023-06-13
Supplement: s1 [file s1]

Supplementary Table S1. Prognostic factors for progression-free survival before and after PSM

|                                          | Univariable analysis |           |                | Multivariable analysis |           |                |
|------------------------------------------|----------------------|-----------|----------------|------------------------|-----------|----------------|
|                                          | HR                   | 95% CI    | <i>p</i> value | HR                     | 95% CI    | <i>p</i> value |
| Before PSM                               |                      |           |                |                        |           |                |
| Treatment (LD combined RT vs Sorafenib)  | 0.47                 | 0.42-0.54 | <0.001         | 0.40                   | 0.35-0.47 | <0.001         |
| Sex (Female vs Male)                     | 1.15                 | 0.96-1.39 | 0.137          | N.S.                   |           |                |
| Age                                      | 1.00                 | 1.00-1.01 | 0.532          | N.S.                   |           |                |
| ECOG PS (2-3 vs 0-1)                     | 1.20                 | 0.96-1.51 | 0.110          | N.S.                   |           |                |
| Child-Pugh class (B-C vs A)              | 1.88                 | 1.63-2.18 | <0.001         | 1.72                   | 1.48-2.01 | <0.001         |
| Prior treatment history (Yes vs No)      | 1.15                 | 1.00-1.32 | 0.052          | N.S.                   |           |                |
| Log(Pretreatment AFP)                    | 1.20                 | 1.14-1.25 | <0.001         | 1.18                   | 1.12-1.23 | <0.001         |
| Tumor size                               | 1.03                 | 1.02-1.04 | <0.001         | 1.03                   | 1.02-1.05 | <0.001         |
| Disease extent (Bilateral vs Unilateral) | 1.49                 | 1.31-1.69 | <0.001         | 1.16                   | 1.02-1.33 | 0.030          |
| LN status (Involved vs Not involved)     | 1.34                 | 1.12-1.62 | 0.002          | 1.22                   | 1.01-1.48 | 0.039          |
| PVTT type (III, IV vs I, II)             | 1.17                 | 1.03-1.33 | 0.018          | N.S.                   |           |                |
| After PSM                                |                      |           |                |                        |           |                |
| Treatment (LD combined RT vs Sorafenib)  | 0.47                 | 0.40-0.56 | <0.001         | 0.41                   | 0.35-0.49 | <0.001         |
| Sex (Female vs Male)                     | 0.96                 | 0.75-1.23 | 0.736          | N.S.                   |           |                |
| Age                                      | 1.00                 | 0.99-1.00 | 0.302          | N.S.                   |           |                |
| ECOG PS (2-3 vs 0-1)                     | 1.42                 | 1.06-1.91 | 0.019          | N.S.                   |           |                |
| Child-Pugh class (B vs A)                | 1.70                 | 1.40-2.06 | <0.001         | 1.55                   | 1.26-1.90 | <0.001         |
| Prior treatment history (Yes vs No)      | 0.94                 | 0.80-1.12 | 0.493          | N.S.                   |           |                |
| Log(Pretreatment AFP)                    | 1.25                 | 1.17-1.32 | <0.001         | 1.22                   | 1.15-1.30 | <0.001         |
| Tumor size                               | 1.04                 | 1.03-1.06 | <0.001         | 1.04                   | 1.02-1.06 | <0.001         |
| Disease extent (Bilateral vs Unilateral) | 1.34                 | 1.13-1.58 | 0.001          | N.S.                   |           |                |
| LN status (Involved vs Not involved)     | 1.40                 | 1.09-1.80 | 0.010          | N.S.                   |           |                |
| PVTT type (III, IV vs I, II)             | 1.17                 | 0.99-1.38 | 0.068          | N.S.                   |           |                |

\*Abbreviations: PSM, propensity score matching; HR, hazard ratio; CI, confidence interval; LD combined RT, liver-directed combined radiotherapy; ECOG PS, Eastern Cooperative Oncology Group performance status; AFP, alpha-fetoprotein; LN, lymph node; PVTT, portal vein tumor thrombosis; N.S., not significant
